# Supplementary material
Source: PubMed Central journal article supplement (PMC1851833)

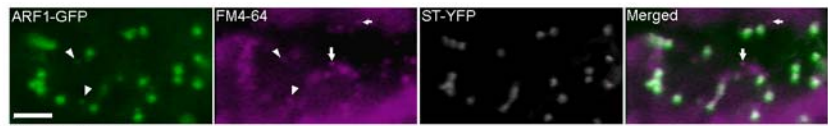

Supplementary figure 1

Supplement: plntphys_pp.106.094953_1.pdf [file plntphys_pp.106.094953_1.pdf]

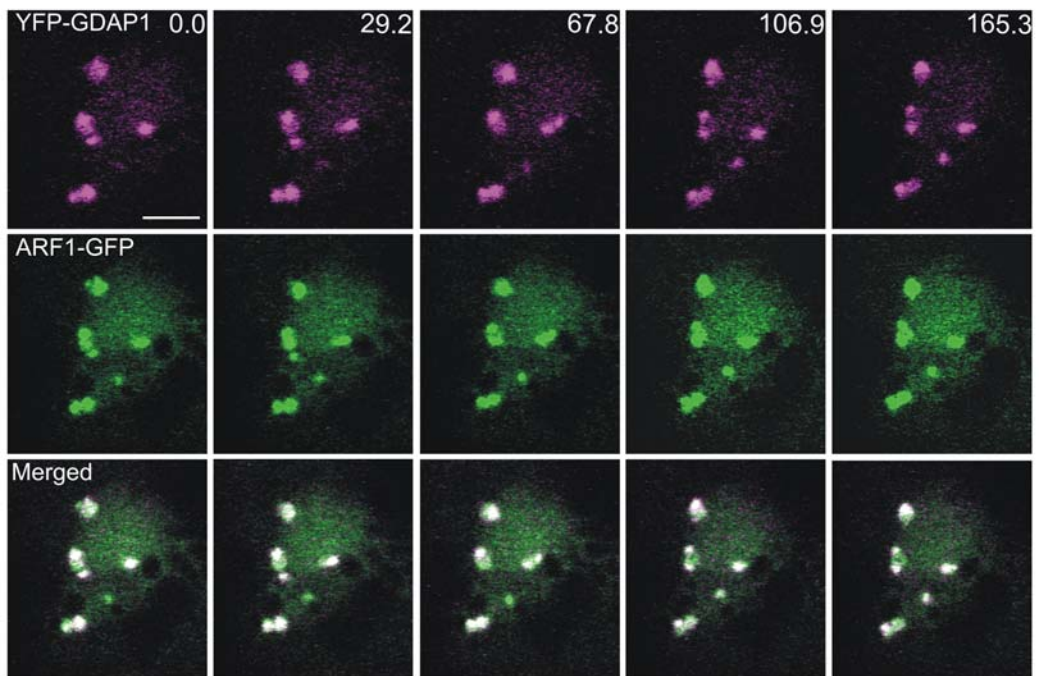

Supplementary figure 2

Supplement: plntphys_pp.106.094953_2.pdf [file plntphys_pp.106.094953_2.pdf]

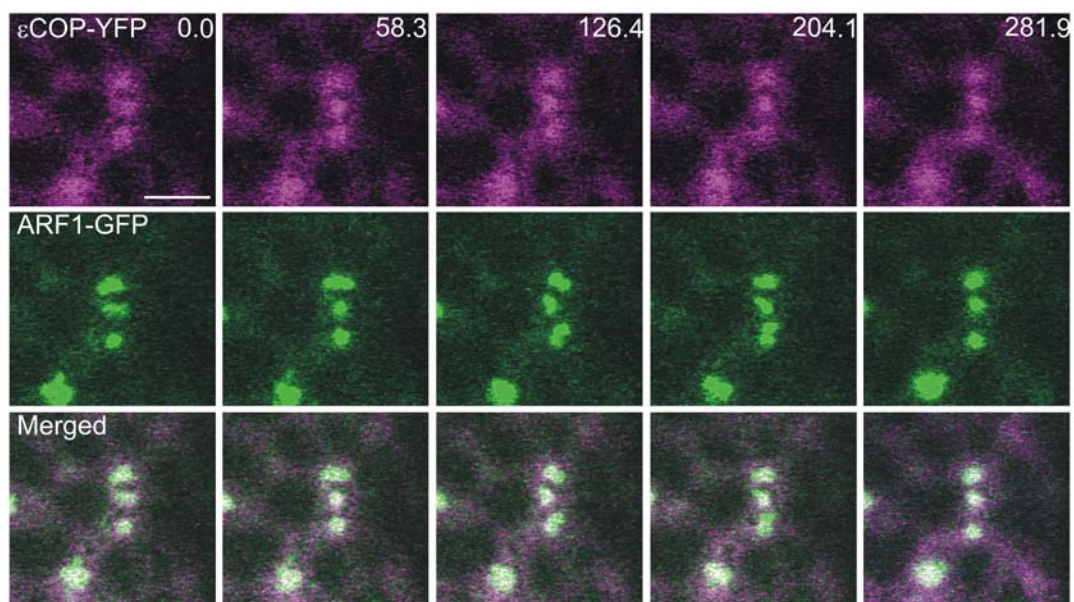

Supplementary figure 3

Supplement: plntphys_pp.106.094953_3.pdf [file plntphys_pp.106.094953_3.pdf]

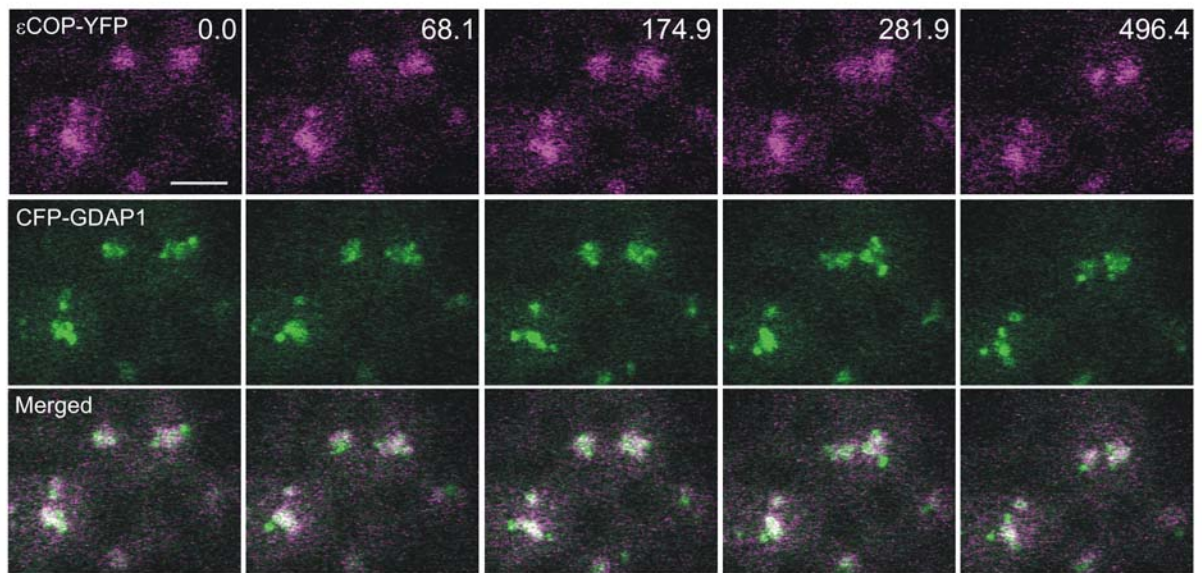

Supplementary figure 4

Supplement: plntphys_pp.106.094953_4.pdf [file plntphys_pp.106.094953_4.pdf]
